# Supplementary material
Source: PubMed Central journal article supplement (PMC4208366)
Supplement: rsif20140349supp1.pdf [file rsif20140349supp1.pdf]

1 **Text S1: Information on Kibale National Park and the Kanyawara Chimpanzee**

2 **Community**

3 Struhsaker [1] provides an overview of Kibale National Park, including forest ecology. The  
4 Kanyawara chimpanzee community, which occupies roughly 40 km<sup>2</sup> of Kibale National Park [2],  
5 was partially habituated to human presence by M. Ghiglieri during 1979-1980 and G. Isabirye-  
6 Basuta during 1983-1985. The Kanyawara community was fully habituated to human observers  
7 by 1990 [3]. R. Wrangham founded the Kibale Chimpanzee Project (KCP) in 1987, and along  
8 with colleagues, has continuously collected data on chimpanzee life history, behavioral  
9 development, and social relationships (among other topics). Funding for KCP is provided by the  
10 U.S. National Science Foundation (awards 9807448 and 0416125), the U.S. National Institutes  
11 of Health, National Geographic Society, L.S.B. Leakey Foundation, and the Wenner-Gren  
12 Foundation.

13

14 To collect behavioral data for this paper, J. Rushmore worked alongside KCP researchers and  
15 field assistants. At the time of this study, the community was comprised of 48 chimpanzees with  
16 12 adult males (aged > 14), 14 adult females (aged > 13), 9 immature males and 6 immature  
17 females (aged between 5-14 and 5-13 respectively; referred to throughout the main text as  
18 juveniles), and 7 dependent offspring (aged ≤ 4).

19

20

21

22

23

24 **Text S2: Additional Methods**

25 *Basic reproductive number ( $\overline{R}_0$ )*

26 Our  $\overline{R}_0$  calculations strictly correspond to the basic reproductive rate definition typically  
27 used in epidemiology literature, where  $R_0$  is the average number of secondary infections caused  
28 by one primary infection in a completely naïve population [4]. This  $R_0$  definition (referred to  
29 here as  $PR_0$  for primary infection  $R_0$ ) has been used to model pathogen transmission on contact  
30 networks [5, 6]. However, several other studies use an alternate definition for  $R_0$  in reference to  
31 network epidemiology, in which  $R_0$  is the number of secondary infections caused by a randomly  
32 selected infected node [i.e., not the index case: 7, 8]. We will henceforth refer to this second  
33 definition as  $SR_0$  (for secondary infection  $R_0$ ).

34  $PR_0$  depends only on mean degree of the population and edge-specific transmissibilities ( $T_{ij}$ ) of  
35 the pathogen, whereas  $SR_0$  also depends on the variance of the degree distribution and clustering.  
36 Hence, using the basis of the  $PR_0$  definition (which was then averaged across months to create  $\overline{R}_0$   
37 as described above) allowed us to assess the impact of network structure (month) on outbreak  
38 size for a pathogen characterized by a particular  $\overline{R}_0$ , without the circular issue of  $\overline{R}_0$  also  
39 depending on inherent aspects of network structure (e.g., degree distribution and clustering).  
40 Furthermore, using the definition of  $PR_0$  allowed us to easily calculate  $\overline{R}_0$  for a given  $\beta\tau$ , by  
41 averaging the expected number of secondary cases for each of the possible 37 index cases across  
42 the nine monthly networks. Using the definition of  $SR_0$  to calculate  $\overline{R}_0$  would require  
43 substantially more complicated simulations (i.e., calculating the expected number of secondary  
44 cases that result from a randomly selected secondary case for each of the 37 index cases across  
45 all nine months). Also,  $SR_0$  may not be appropriate for simulating pathogen transmission on  
46 small networks, as basic reproductive rate estimates based on the number of secondary cases

47 could be biased due to the network already being saturated. Lastly, we note that because  $PR_0$   
48 refers to the reproductive rate for an index case, which on average will have a lower mean degree  
49 than a secondary case, our  $\overline{R}_0$  calculations are expected to be slightly lower than  $SR_0$  calculations.

50

#### 51 *Permutation tests*

52 The permutation-based regression test [9] uses node-level parameters (where each row in the  
53 dataset represents a node and columns provide attribute data for each node). The test first  
54 calculates the regression slope coefficients of the observed dataset; then, over 30,000  
55 permutations, the algorithm randomly shuffles values of the dependent variable while leaving the  
56 values of the independent variables in place. Regression coefficients are recalculated after each  
57 permutation, and the P-value for each parameter is calculated by determining the proportion of  
58 permutations that yielded numbers with larger absolute values than the original regression for the  
59 observed dataset. This test controls for the interdependencies of network nodes. Because we  
60 observed a non-linear relationship between mean outbreak size and  $\overline{R}_0$ , we ran a separate model  
61 for each of the four  $\overline{R}_0$  values.

62

63

64 **Table S1: Chimpanzee trait data for study subjects ( $n = 37$ ).** This table shows the sex, age  
 65 class, family size, and trait-based group for all chimpanzees included in the study.

| chimpanzee ID | sex <sup>1</sup> | age class <sup>2</sup> | family size    | trait-based group <sup>3</sup> |
|---------------|------------------|------------------------|----------------|--------------------------------|
| AJ            | M                | A                      | 1              | HM                             |
| AL            | F                | A                      | 3              | CR-L                           |
| AT            | M                | J                      | 3              | CR-L                           |
| AZ            | M                | J                      | 3              | CR-L                           |
| BB            | M                | A                      | 1              | HM                             |
| BL            | F                | A                      | 3              | ER                             |
| BO            | M                | J                      | 3              | ER                             |
| BU            | F                | J                      | 3              | ER                             |
| ES            | M                | A                      | 2 <sup>4</sup> | MM                             |
| EU            | F                | J                      | 2 <sup>4</sup> | CR-S                           |
| KK            | M                | A                      | 1              | HM                             |
| LK            | M                | A                      | 1              | HM                             |
| LR            | F                | A                      | 1              | CR-S                           |
| ML            | F                | A                      | 1              | ER                             |
| MS            | M                | A                      | 1              | HM                             |
| MU            | F                | A                      | 2              | ER                             |
| MX            | M                | J                      | 2              | ER                             |
| NP            | F                | J                      | 1              | CR-S                           |
| OG            | M                | J                      | 4              | CR-L                           |
| OM            | F                | J                      | 4              | CR-L                           |
| OT            | F                | J                      | 4              | CR-L                           |
| OU            | F                | A                      | 4              | CR-L                           |
| PB            | M                | A                      | 1              | LM                             |
| PG            | M                | A                      | 1              | MM                             |
| QT            | F                | A                      | 1              | CR-S                           |
| RD            | F                | A                      | 1              | ER                             |
| ST            | M                | A                      | 1              | MM                             |
| TG            | F                | A                      | 4              | CR-L                           |
| TJ            | M                | A                      | 4              | LM                             |
| TS            | F                | J                      | 4              | CR-L                           |
| TT            | M                | J                      | 4              | CR-L                           |
| TU            | M                | A                      | 1              | MM                             |
| UM            | F                | A                      | 2              | ER                             |
| UN            | M                | J                      | 2              | ER                             |
| WA            | F                | A                      | 1              | ER                             |
| WL            | F                | A                      | 1              | CR-S                           |
| YB            | M                | A                      | 1              | LM                             |

66 <sup>1</sup>Sex: M=male, F=female

67 <sup>2</sup>Age Class: A=adult, J=juvenile [as defined in ref. 10]

68 <sup>3</sup>Trait-based group: HM, MM, and LM refer to high-, medium-, and low-ranking adult males, respectively; CR-L  
 69 refers to core-ranging adult females and juveniles with families larger than 2 members; CR-S refers to core-ranging  
 70 adult females and juveniles with families smaller than 3 members; ER refers to edge-ranging adult females and  
 71 juveniles

72 <sup>4</sup>Even though their mother was deceased, ES and EU (a brother-sister pair) were considered a family unit, as ES and  
 73 EU spent more than 65% of their time together

74 **Table S2: Comparison of minimum coverage requirements across vaccination strategies**

| a. Minimum Coverage Threshold:      |                   |                   |                   |                    |
|-------------------------------------|-------------------|-------------------|-------------------|--------------------|
| vaccination strategy                | $\bar{R}_0 = 0.7$ | $\bar{R}_0 = 1.5$ | $\bar{R}_0 = 3.0$ | $\bar{R}_0 = 10.0$ |
| centrality-based                    | 0% (0)            | 2.70% (1)         | 18.92% (7)        | 32.43% (12)        |
| trait-based                         | 0% (0)            | 2.70% (1)         | 21.62% (8)*       | 32.43% (12)        |
| random                              | 0% (0)            | 5.41% (2)         | 24.32% (9)        | 37.84% (14)        |
| b. Conservative Coverage Threshold: |                   |                   |                   |                    |
| vaccination strategy                | $\bar{R}_0 = 0.7$ | $\bar{R}_0 = 1.5$ | $\bar{R}_0 = 3.0$ | $\bar{R}_0 = 10.0$ |
| centrality-based                    | 0% (0)            | 27.03% (10)       | 45.95% (17)       | 62.16% (23)        |
| trait-based                         | 5.41% (2)         | 35.14% (13)*      | 45.95% (17)       | 64.86% (24)        |
| random                              | 8.11% (3)         | 43.24% (16)       | 56.76% (21)       | 67.57% (25)        |

75

76 For each vaccination strategy, the coverage threshold is provided as a percentage of the community, with the number of individuals  
77 vaccinated in parentheses, for A) the mean outbreak size to affect < 30% of the community (Minimum Coverage Threshold), and B)  
78 an outbreak to affect < 30% of the community in at least 95% of the simulations (Conservative Coverage Threshold). The table shows  
79 results for trait-based simulations using a single adult male category (M). Results were identical for simulations using this category M  
80 or three adult male categories (HM, MM, LM; see Results), except for a couple instances (\*) in which simulations using HM, MM,  
81 and LM categories required vaccinating one less individual.

82 **Figure S1. Comparing bond percolation and temporal chain-binomial model outcomes for pathogen transmission in proximity**  
 83 **networks**

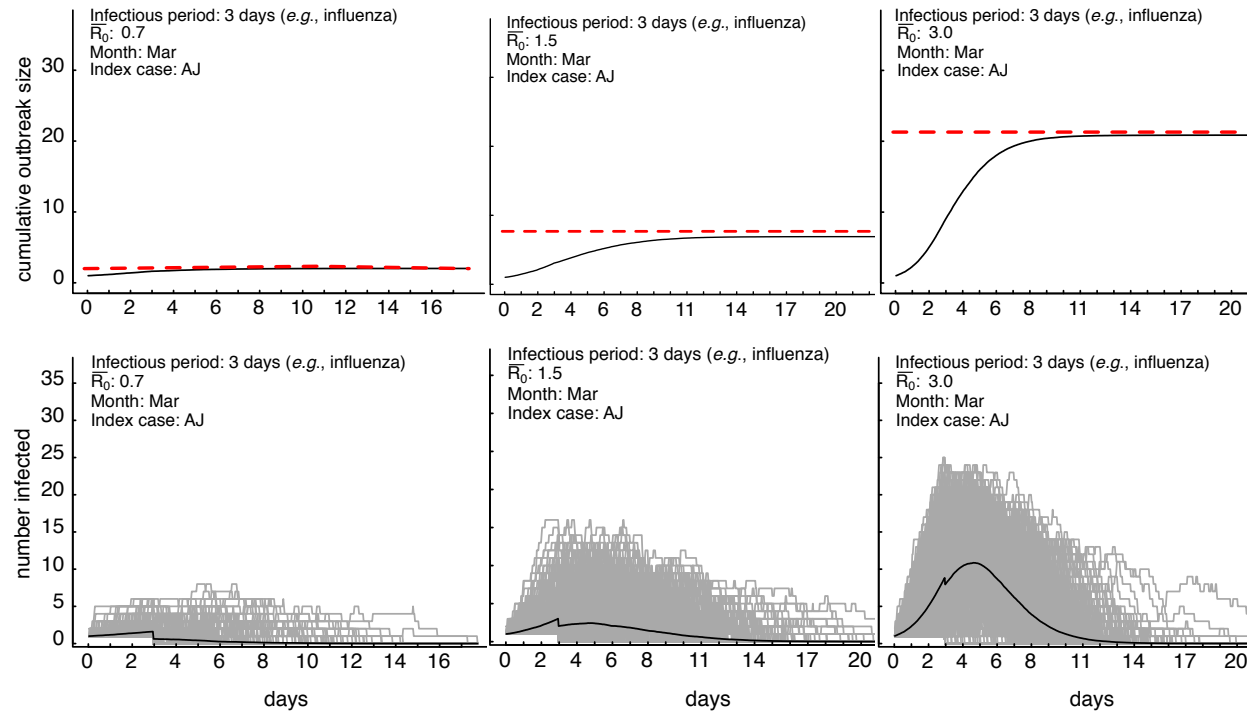

84  
 85 The top row shows cumulative outbreak size over time for a range of  $\bar{R}_0$  values (by panel) using a temporal chain binomial model with  
 86 a fixed recovery rate (solid black line) and the mean final outbreak size as determined by bond percolation (dotted red line). These  
 87 panels confirm that chain binomial and bond percolation model outcomes were consistent. The bottom row shows 1000 simulations

- 88 (grey lines) of the number of infected individuals over time for a range of  $\bar{R}_0$  values (by panel) using a temporal chain binomial model.
- 89 The solid black line shows the average number of individuals infected over time (*i.e.*, averaged across the 1000 simulations).

92 **Figure S2. Relationship between monthly network density and mean outbreak size**

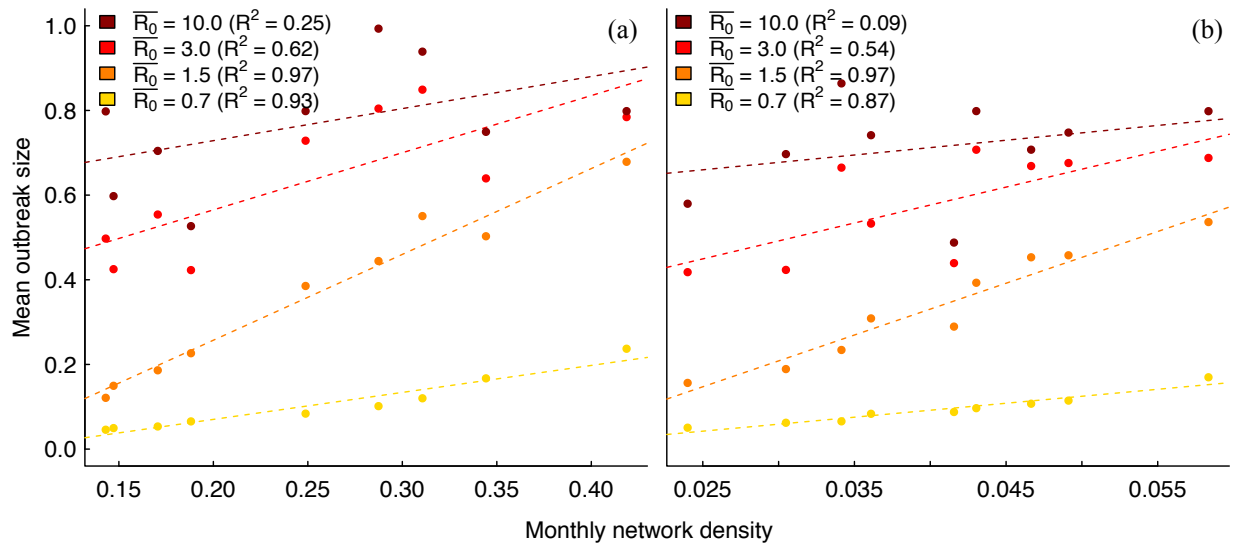

93  
94 Coefficients of determination are shown between monthly network density and mean outbreak  
95 size (averaged across all index cases) for four different  $\overline{R}_0$  values for party networks (a) and  
96 proximity networks (b). Note that for lower  $\overline{R}_0$  values, when density is low the pathogen only  
97 reaches a small proportion of the community leading to small outbreak sizes; when density is  
98 high, outbreaks can spread to more individuals and lead to relatively large mean outbreak sizes.  
99 Alternatively, for higher  $\overline{R}_0$  values (particularly when  $\overline{R}_0$  reaches 10), the pathogen can quickly  
100 spread to a large proportion of the population regardless of network density. Thus, our  
101 simulations showed that network density plays a more important role in determining mean  
102 outbreak size when pathogens have a low to moderate level of infectiousness than when  
103 pathogens are highly contagious.



104 **Figure S3. Evaluation of vaccination strategies on party networks by the Conservative**  
 105 **Coverage Threshold**

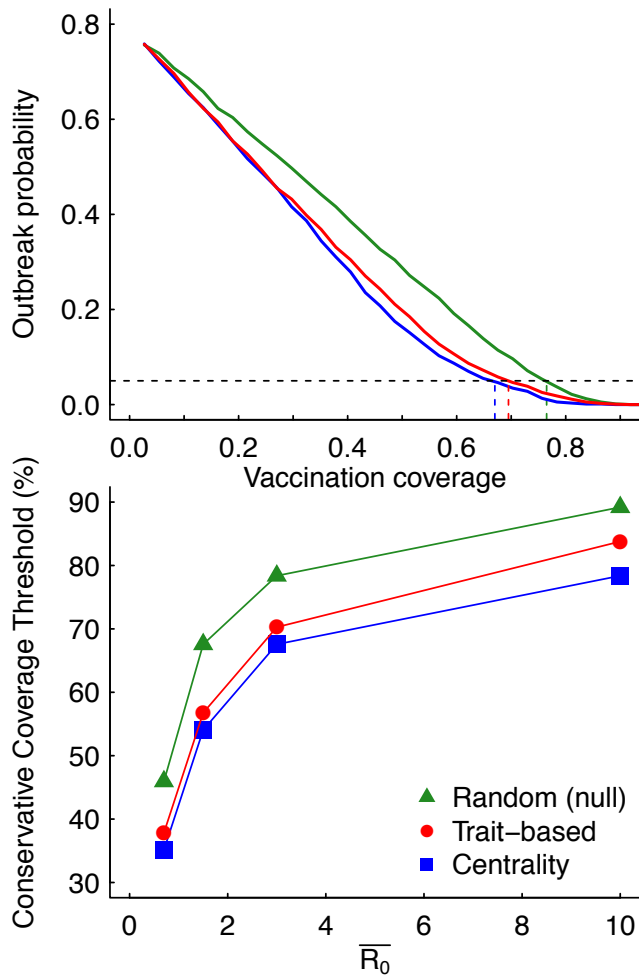

106  
 107 The top panel shows the outbreak probability (the proportion of simulations resulting in an  
 108 outbreak greater than 10% of the community) for centrality-based vaccinations (blue), trait-based  
 109 vaccinations (red), and random vaccinations (green) at varying levels of coverage (shown as a  
 110 proportion of the community) when  $\bar{R}_0 = 3.0$ . The black dotted line marks the Conservative  
 111 Coverage Threshold, at which no more than 5% of the simulations result in outbreaks. The  
 112 bottom panel shows this Conservative Coverage Threshold for each vaccination strategy and  $\bar{R}_0$   
 113 combination.

114 **Figure S4. Mean outbreak size results for pathogen transmission simulations on party-level**  
 115 **chimpanzee networks**

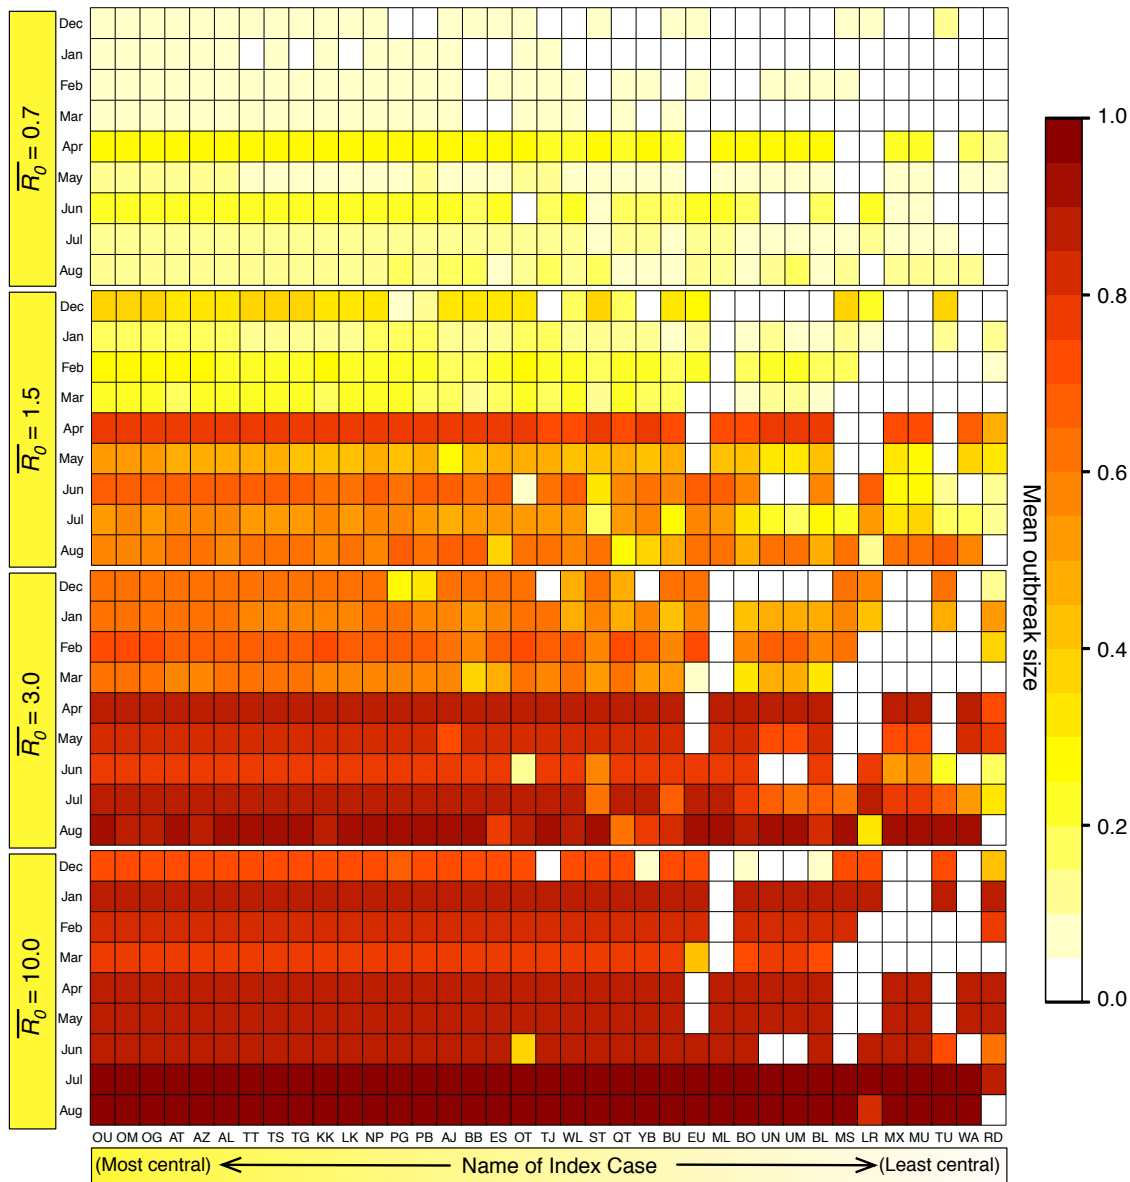

116  
 117 The color of each cell shows the average proportion of the community ( $n = 37$ ) that was infected  
 118 across the 1000 replicates per unique combination of parameters. The x-axis shows the identities  
 119 of the index cases, ordered from highest to lowest mean weighted degree centrality (i.e.,  
 120 averaged across months). Estrous females were present during Jan ( $n = 1$  estrous female), Apr ( $n$   
 121 = 1), May ( $n = 1$ ), Jun ( $n = 1$ ), Jul ( $n = 2$ ), and Aug ( $n = 2$ ).

122 **References:**

- 123 1. Struhsaker, T.T. 1997 *Ecology of an African rain forest: logging in Kibale and the*  
124 *conflict between conservation and exploitation*. Gainesville: University Press of Florida.
- 125 2. Wilson, M.L., Kahlenberg S.M., Wells M., Wrangham R.W. 2012 Ecological and social  
126 factors affect the occurrence and outcomes of intergroup encounters in chimpanzees.  
127 *Anim Behav* **83**(1), 277-291.
- 128 3. Wrangham, R.W., Clark A.P., Isabirye-Basuta G. 1992 Female social relationships and  
129 social organization of Kibale Forest chimpanzees. In *Topics in primatology* (eds. Nishida,  
130 T., McGrew W.C., Marler P., Pickford M., de Waal F.B.M.), pp. 81-98. Tokyo, University  
131 of Tokyo Press.
- 132 4. Anderson, R.M., Medley G., May R., Johnson A. 1986 A preliminary study of the  
133 transmission dynamics of the human immunodeficiency virus (HIV), the causative agent  
134 of AIDS. *Math Med Biol* **3**(4), 229-263.
- 135 5. Hamede, R., Bashford J., Jones M., McCallum H. 2011 Simulating devil facial tumour  
136 disease outbreaks across empirically derived contact networks. *J Appl Ecol*.
- 137 6. Davis, S., Trapman P., Leirs H., Begon M., Heesterbeek J. 2008 The abundance threshold  
138 for plague as a critical percolation phenomenon. *Nature* **454**(7204), 634-637.
- 139 7. Meyers, L.A. 2007 Contact network epidemiology: Bond percolation applied to  
140 infectious disease prediction and control. *Bull Am Math Soc* **44**(1), 63.
- 141 8. Newman, M.E.J. 2002 Spread of epidemic disease on networks. *Phys Rev E* **66**(1),  
142 016128.
- 143 9. Hanneman, R.A., Riddle M. 2005 Introduction to social network methods. (Riverside,  
144 CA, University of California Riverside.
- 145 10. Rushmore, J., Caillaud D., Matamba L., Stumpf R.M., Borgatti S.P., Altizer S. 2013  
146 Social network analysis of wild chimpanzees provides insights for predicting infectious  
147 disease risk. *J Anim Ecol* **82**, 976–986. (doi:10.1111/1365-2656.12088).
- 148
- 149
